# Supplementary material for: Ammonium Glycyrrhizinate and Bergamot Essential Oil Co-Loaded Ultradeformable Nanocarriers: An Effective Natural Nanomedicine for In Vivo Anti-Inflammatory Topical Therapies
Source: MDPI journal article supplement (doi:10.3390/biomedicines10051039), 2022-04-30
Supplement: s1 [file s1]

# Ammonium glycyrrhizinate and Bergamot essential oil co-loaded ultradeformable nanocarriers: an effective natural nanomedicine for in vivo anti-inflammatory topical therapies

Maria Chiara Cristiano <sup>1\*</sup>, Nicola d'Avanzo <sup>2\*</sup>, Antonia Mancuso <sup>1</sup>, Martine Tarsitano <sup>3</sup>, Antonella Barone <sup>1</sup>, Daniele Torella<sup>1</sup>, Massimo Fresta <sup>3</sup>, Donatella Paolino <sup>1\*</sup>

<sup>1</sup> Department of Experimental and Clinical Medicine, University "Magna Græcia" of Catanzaro Campus Universitario-Germaneto, Viale Europa, Catanzaro, 88100, Italy; mchiara.cristiano@unicz.it; antonia.mancuso@unicz.it; barone@unicz.it; dtorella@unicz.it; paolino@unicz.it

<sup>2</sup> Department of Pharmacy, University "G. d'Annunzio" of Chieti-Pescara, Via dei Vestini n.31, Chieti, 66100, Italy; nicola.davanzo@unich.it

<sup>3</sup> Department of Health Science, University "Magna Græcia" of Catanzaro Campus Universitario-Germaneto, Viale Europa, Catanzaro, 88100, Italy; martine.tarsitano@studenti.unicz.it; fresta@unicz.it

\* Correspondence: paolino@unicz.it; Tel.: +39 09613694211

† These authors equally contributed

**Table S1.** Mean sizes and PdI values of formulations after freeze-drying.

| Samples | Cryoprotectan (%w/v) |    | Mean size (nm)              | PdI           |
|---------|----------------------|----|-----------------------------|---------------|
| A1      | Sucrose              | 2% | 351 ± 15                    | 0.541 ± 0.050 |
| A2      |                      | 5% | 285 ± 4                     | 0.425 ± 0.042 |
| A3      | Trehalose            | 2% | 389 ± 7                     | 0.501 ± 0.069 |
| A4      |                      | 5% | 401 ± 11                    | 0.684 ± 0.023 |
| A5      | Mannose              | 2% | 502 ± 14                    | 0.537 ± 0.061 |
| A6      |                      | 5% | 423 ± 9                     | 0.498 ± 0.058 |
| A7      | Mannitol             | 2% | 394 ± 5                     | 0.608 ± 0.058 |
| A8      |                      | 5% | Unsuitable for resuspension |               |
| B1      | Sucrose              | 2% | 616 ± 19                    | 0.517 ± 0.060 |
| B2      |                      | 5% | 447 ± 5                     | 0.512 ± 0.028 |
| B3      | Trehalose            | 2% | 535 ± 9                     | 0.559 ± 0.028 |
| B4      |                      | 5% | 588 ± 11                    | 0.892 ± 0.064 |
| B5      | Mannose              | 2% | 580 ± 69                    | 0.705 ± 0.279 |
| B6      |                      | 5% | 446 ± 6                     | 0.580 ± 0.040 |
| B7      | Mannitol             | 2% | 609 ± 22                    | 0.554 ± 0.017 |
| B8      |                      | 5% | Unsuitable for resuspension |               |
| C1      | Sucrose              | 2% | 278 ± 15                    | 0.576 ± 0.130 |
| C2      |                      | 5% | 414 ± 13                    | 0.434 ± 0.081 |
| C3      | Trehalose            | 2% | 281 ± 1                     | 0.564 ± 0.007 |
| C4      |                      | 5% | 340 ± 8                     | 0.508 ± 0.024 |
| C5      | Mannose              | 2% | 208 ± 5                     | 0.512 ± 0.023 |
| C6      |                      | 5% | 200 ± 1                     | 0.439 ± 0.010 |

|    |           |    |                         |               |
|----|-----------|----|-------------------------|---------------|
| C7 | Mannitol  | 2% | 269 ± 23                | 0.694 ± 0.202 |
| C8 |           | 5% | Unsuitable resuspension |               |
| D1 | Sucrose   | 2% | 169 ± 3                 | 0.502 ± 0.028 |
| D2 |           | 5% | 187 ± 2                 | 0.450 ± 0.009 |
| D3 | Trehalose | 2% | 206 ± 3                 | 0.530 ± 0.027 |
| D4 |           | 5% | 212 ± 6                 | 0.526 ± 0.019 |
| D5 | Mannose   | 2% | 221 ± 2                 | 0.495 ± 0.010 |
| D6 |           | 5% | 269 ± 1                 | 0.512 ± 0.007 |
| D7 | Mannitol  | 2% | 240 ± 11                | 0.562 ± 0.025 |
| D8 |           | 5% | Unsuitable resuspension |               |
| E1 | Sucrose   | 2% | 305 ± 9                 | 0.259 ± 0.058 |
| E2 |           | 5% | 298 ± 5                 | 0.187 ± 0.046 |
| E3 | Trehalose | 2% | 306 ± 3                 | 0.308 ± 0.056 |
| E4 |           | 5% | 361 ± 5                 | 0.284 ± 0.032 |
| E5 | Mannose   | 2% | 289 ± 2                 | 0.145 ± 0.048 |
| E6 |           | 5% | 401 ± 5                 | 0.347 ± 0.025 |
| E7 | Mannitol  | 2% | 412 ± 6                 | 0.268 ± 0.042 |
| E8 |           | 5% | Unsuitable resuspension |               |
| F1 | Sucrose   | 2% | 550 ± 10                | 0.424 ± 0.085 |
| F2 |           | 5% | 332 ± 6                 | 0.452 ± 0.015 |
| F3 | Trehalose | 2% | 473 ± 13                | 0.504 ± 0.071 |
| F4 |           | 5% | 528 ± 7                 | 0.804 ± 0.015 |
| F5 | Mannose   | 2% | 437 ± 38                | 0.728 ± 0.207 |
| F6 |           | 5% | 415 ± 7                 | 0.472 ± 0.023 |
| F7 | Mannitol  | 2% | 500 ± 7                 | 0.507 ± 0.016 |
| F8 |           | 5% | 279 ± 5                 | 0.508 ± 0.018 |
| G1 | Sucrose   | 2% | 244 ± 17                | 0.731 ± 0.146 |
| G2 |           | 5% | 396 ± 28                | 0.751 ± 0.181 |
| G3 | Trehalose | 2% | 297 ± 6                 | 0.591 ± 0.017 |
| G4 |           | 5% | 352 ± 1                 | 0.618 ± 0.005 |
| G5 | Mannose   | 2% | 323 ± 14                | 0.902 ± 0.125 |
| G6 |           | 5% | 287 ± 1                 | 0.558 ± 0.002 |
| G7 | Mannitol  | 2% | 278 ± 10                | 0.495 ± 0.032 |
| G8 |           | 5% | 236 ± 2                 | 0.456 ± 0.004 |
| H1 | Sucrose   | 2% | 214 ± 1                 | 0.468 ± 0.008 |
| H2 |           | 5% | 243 ± 2                 | 0.433 ± 0.021 |
| H3 | Trehalose | 2% | 230 ± 2                 | 0.493 ± 0.027 |
| H4 |           | 5% | 264 ± 4                 | 0.472 ± 0.023 |
| H5 | Mannose   | 2% | 205 ± 1                 | 0.517 ± 0.004 |
| H6 |           | 5% | 290 ± 5                 | 0.477 ± 0.025 |
| H7 | Mannitol  | 2% | 210 ± 2                 | 0.505 ± 0.036 |
| H8 |           | 5% | 188 ± 2                 | 0.405 ± 0.009 |
